# Supplementary material
Source: publisher figshare collection journal article supplement (https://future-science-group.figshare.com/articles/dataset/_/23056295)
Supplement: Supplementary file 1 [file 1]

**Supplementary Figures**


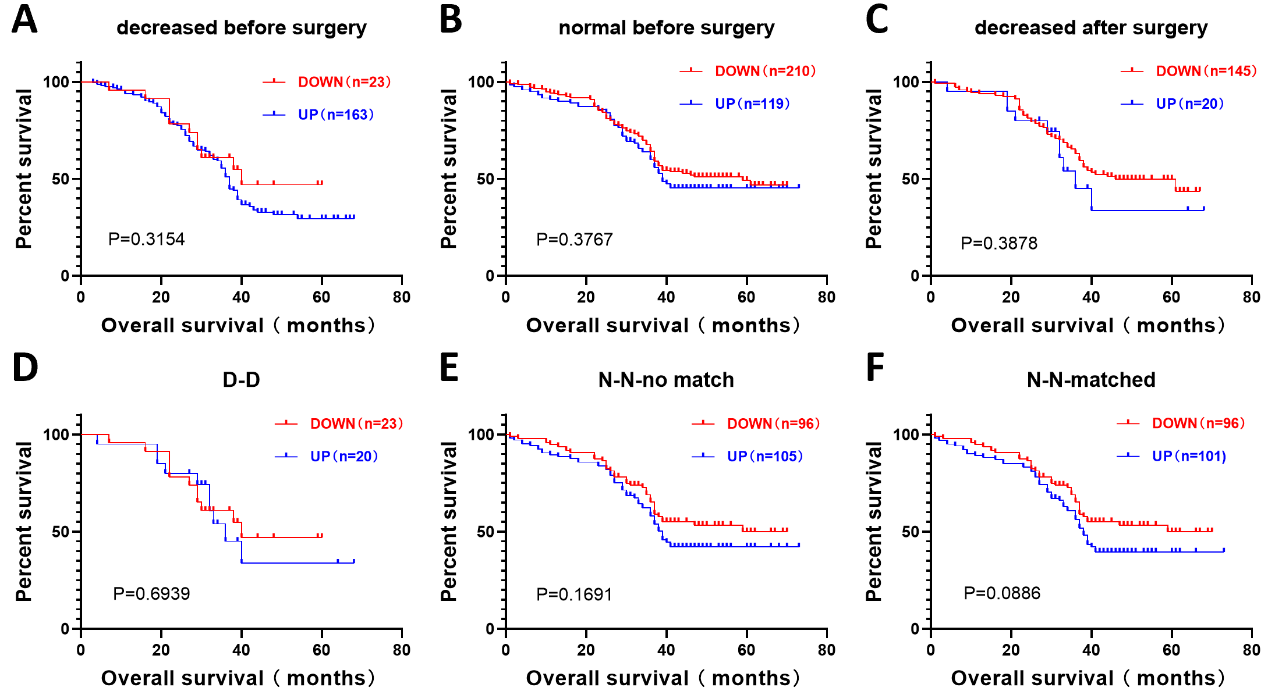


**Figure S1.** **The prognosis in patients with lung cancer according to whether PBE (before and/or after operation) was in the normal range** Among all lung cancer patients with preoperative decreased PBE (A), preoperative normal PBE (B), or postoperative decreased PBE (C), the DOWN group did not have a better prognosis than the UP group (p=0.3154, 0.3767, 0.3878). Among all lung cancer patients with decreased preoperative–decreased postoperative PBE (D) and normal preoperative–normal postoperative PBE (E-F), the DOWN group did not have a better prognosis than the UP group (p=0.6939, 0.1691, 0.0886).


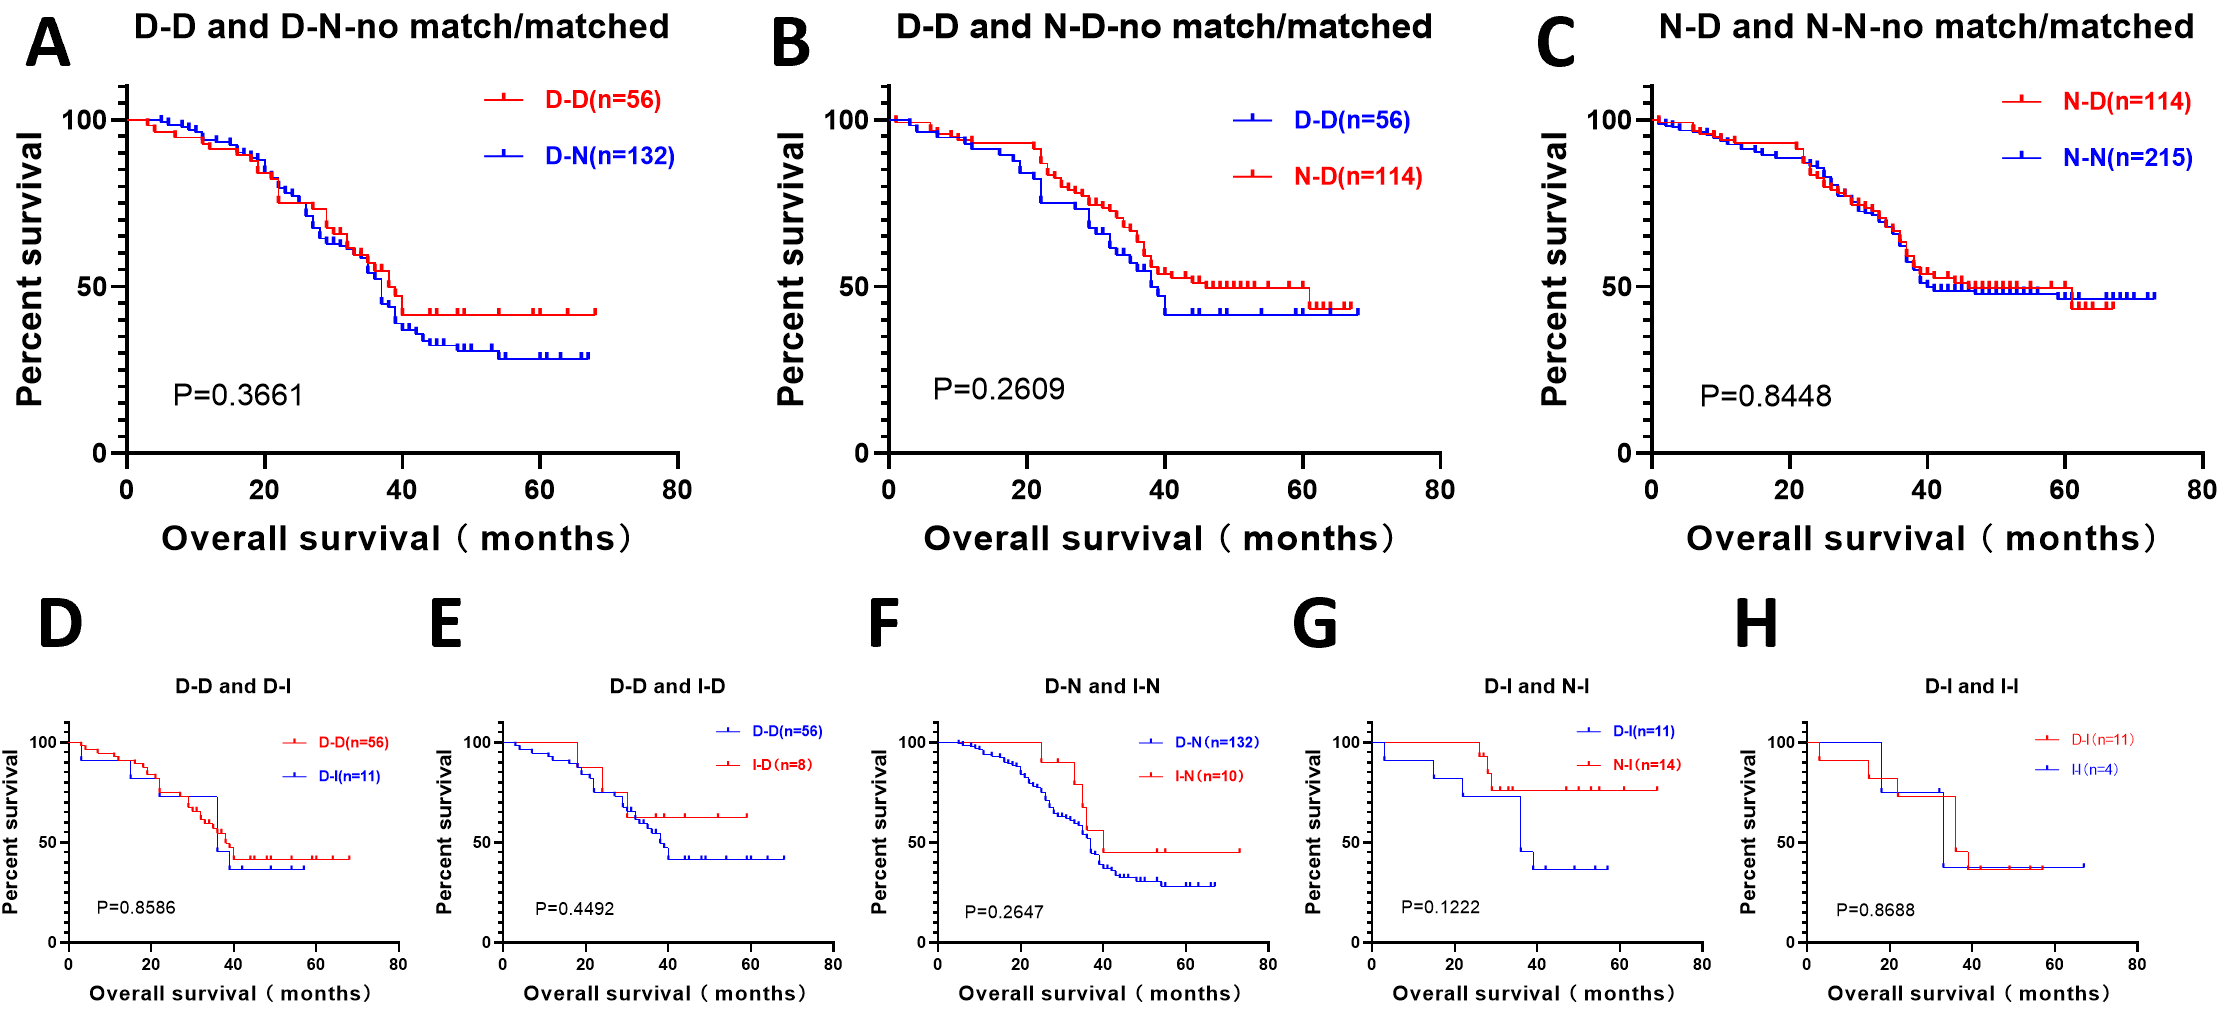


**Figure S2. The prognosis in patients with lung cancer according to the relationship among the groups of D-D, D-N,N-N,N-D, I-N,N-I, I-D, D-I, and I-I** No significant difference was found in the comparison of each group, and the P value is indicated in the figures.
